# Supplementary material for: Performance Improvement Plan towards Energy-Efficient Naturally Ventilated Houses in Tropical Climate Regions
Source: MDPI journal article supplement (doi:10.3390/su151612173), 2023-08-09
Supplement: s1 [file s1]

## Supplementary materials

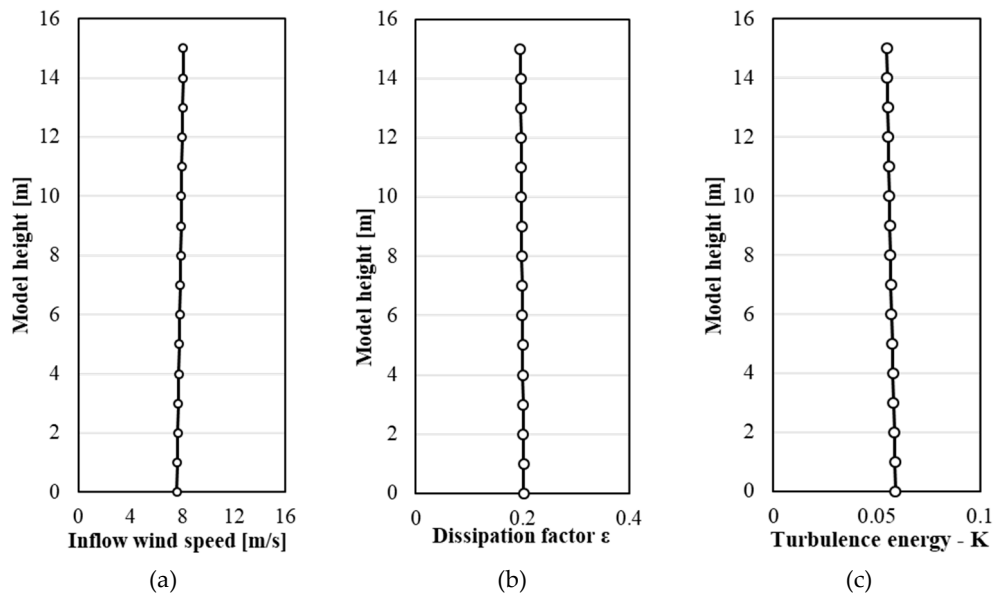

**Figure S1.** Inflow boundary condition (a) inflow wind speed, (b) turbulence energy dissipation rate, and (c) turbulence energy.
